# Supplementary material for: Structure of a Classical MHC Class I Molecule That Binds “Non-Classical” Ligands
Source: PubMed Central journal article supplement (PMC2998441; doi:10.1371/journal.pbio.1000557), 2010-12-07

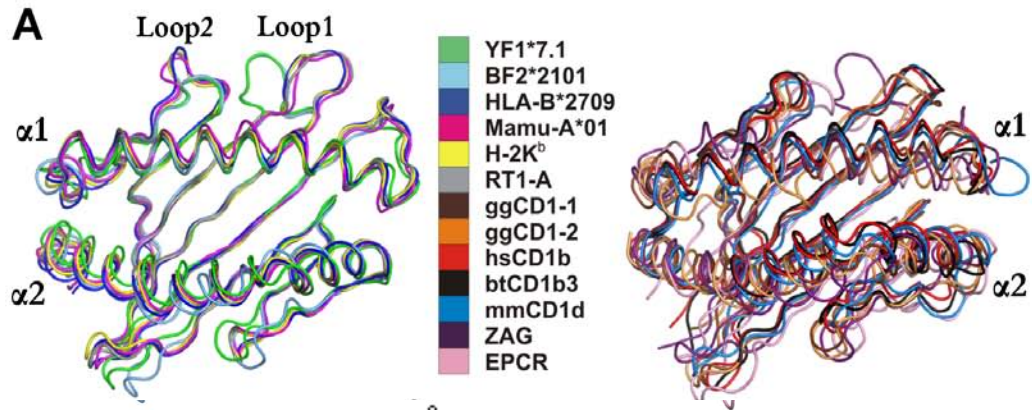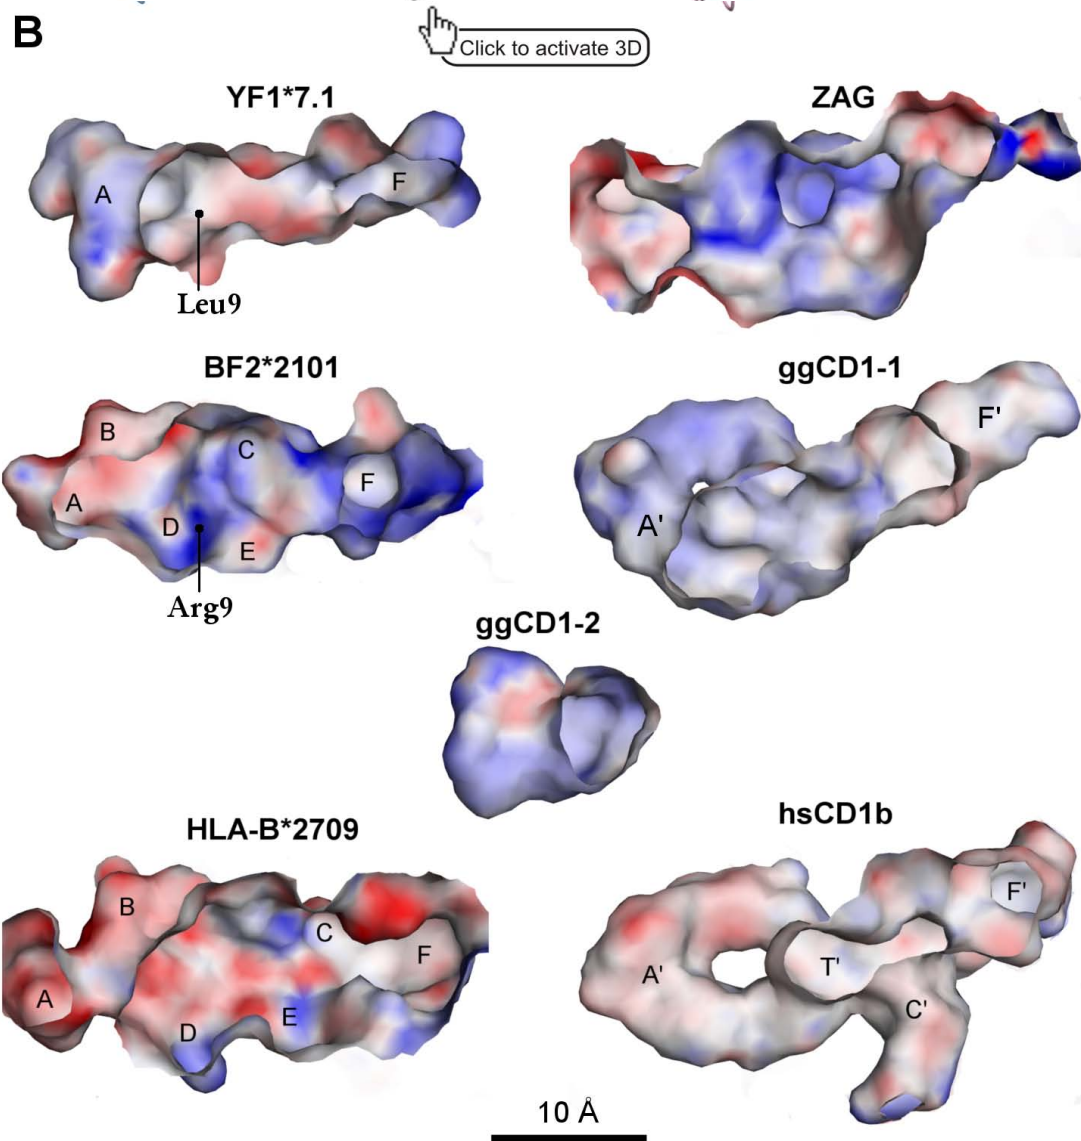

Supplement: pbio.1000557.s002.pdf [file pbio.1000557.s002.pdf]
